# Supplementary material for: The diagnostic accuracy of HbA1c in detecting gestational diabetes mellitus among Chinese pregnant individuals
Source: PubMed Central journal article supplement — Ann Transl Med. 2020 Aug;8(16):1014. doi: 10.21037/atm-20-5464 (PMC7475463; doi:10.21037/atm-20-5464), 2020-08
Supplement: atm-08-16-1014-dss.pdf [file atm-08-16-1014-dss.pdf]

## Data Sharing Statement

|                     |                                                                                                                                                     |                                                                                                                                                                                 |
|---------------------|-----------------------------------------------------------------------------------------------------------------------------------------------------|---------------------------------------------------------------------------------------------------------------------------------------------------------------------------------|
| <b>Article Info</b> | <a href="http://dx.doi.org/10.21037/atm-20-5464">http://dx.doi.org/10.21037/atm-20-5464</a>                                                         |                                                                                                                                                                                 |
| <b>Item</b>         | <b>Question</b>                                                                                                                                     | <b>Authors' Response<br/>(place "-" if not applicable)</b>                                                                                                                      |
| 1                   | Would you like to share data collected for your study to others?                                                                                    | Yes.                                                                                                                                                                            |
| 2                   | If not, would you like to share the reason for your decision?                                                                                       | -                                                                                                                                                                               |
| 3                   | What data in particular will be shared?                                                                                                             | The HbA1c and OGTT data in particular will be shared as well as the clinical characteristics of pregnant individuals of gestational diabetes mellitus (GDM) and non-GDM groups. |
| 4                   | Any other documents will be shared? Such as study protocol, statistical analysis plan, informed consent form, clinical study report, analytic code. | Study design, statistical analysis plan and clinical study report will also be shared if requested.                                                                             |
| 5                   | When will data availability begin?                                                                                                                  | From the publication date.                                                                                                                                                      |
| 6                   | When will data availability end?                                                                                                                    | Two years within the publication date.                                                                                                                                          |
| 7                   | To whom will you share the data?                                                                                                                    | Anyone who is interested in studies of GDM.                                                                                                                                     |
| 8                   | For what type of analysis or purpose?                                                                                                               | For analysis to evaluate the diagnostic accuracy of HbA1c in detecting GDM.                                                                                                     |
| 9                   | How or where can the data/documents be obtained?                                                                                                    | Emails could be sent to the address below to obtain the shared data: microphage @163.com.                                                                                       |
| 10                  | Any other restrictions?                                                                                                                             | We may balance the potential benefits and risks for each request and then provide the data that could be shared.                                                                |
